# Supplementary material
Source: PubMed Central journal article supplement (PMC3972264)
Supplement: NIHMS547833-supplement-01.pdf [file NIHMS547833-supplement-01.pdf]

**Supplemental Table 1.** Polymorphism profile of the case isolate in comparison to vaccine Oka, parental Oka (clade 2, subtype 1), clade 1 (representative strain Dumas), clade 3 (representative strain Webster), clade 4 (strain DR), clade 5 (strain CA123), and provisional clade VI (Spain M4). The single nucleotide polymorphism (SNP) positions are based on the reference sequence for Dumas strain (GenBank #9625875).

|       |    | Open Reading Frame | 38    | 54    | 62     |        |
|-------|----|--------------------|-------|-------|--------|--------|
|       |    | Position           | 69348 | 95241 | 106262 | 107252 |
| Clade | 2  | Case Isolate       | G     | C     | C      | C      |
|       | 2  | Oka vaccine        | G     | C     | C      | C      |
|       | 2  | Parental Oka       | G     | T     | T      | T      |
|       | 1  | Dumas              | A     | T     | T      | T      |
|       | 3  | Webster            | A     | T     | T      | T      |
|       | 4  | DR                 | A     | C     | T      | T      |
|       | 5  | CA123              | A     | C     | T      | T      |
|       | VI | Spain M4           | A     | T     | T      | T      |

**Supplemental Table 2.** Immunological Findings\*.

|                                                                          |                                                           | <b>Normal values</b>               |
|--------------------------------------------------------------------------|-----------------------------------------------------------|------------------------------------|
| Total T lymphocytes (CD3 <sup>+</sup> )                                  | 2354/ $\mu$ L (10.9%)                                     | 500-4400/ $\mu$ L (11-51.1%)       |
| TCR $\alpha^+/\beta^+$                                                   | 91.6%                                                     | >85%                               |
| TCR $\gamma^+/\delta^+$                                                  | 7.9%                                                      | 0.5-6%                             |
| CD4 <sup>+</sup>                                                         | 770/ $\mu$ L                                              | 700-2200/ $\mu$ L                  |
| Recent thymic emigrant T cells (CD31 <sup>+</sup> /CD45RA <sup>+</sup> ) | 50.7%                                                     | 59.3-74.8%                         |
| Naive T cells (CD45RA <sup>+</sup> )                                     | 77.4%                                                     | 9.5-41.9%                          |
| Memory T cells (CD45RO <sup>+</sup> )                                    | 21.7%                                                     | 16.5-42.2%                         |
| Regulatory T cells (FOXP3 <sup>+</sup> )                                 | 5.7%                                                      |                                    |
| IL-17 <sup>+</sup>                                                       | 1.4%                                                      | >0.3%                              |
| IFN- $\gamma^+$                                                          | 9.6%                                                      | >5.3%                              |
| CD8 <sup>+</sup>                                                         | 214/ $\mu$ L                                              | 490-1300/ $\mu$ L                  |
| Response to mitogens                                                     | Reduced to PHA and ConA; normal to PWM                    |                                    |
| Response to antigens                                                     | Reduced to tetanus; normal to Candida                     |                                    |
| NK cells (CD16 <sup>+</sup> /CD56 <sup>+</sup> )                         | 167/ $\mu$ L                                              | 130-720/ $\mu$ L                   |
| B lymphocytes (CD19 <sup>+</sup> )                                       | 1090/ $\mu$ L                                             | 390-1400/ $\mu$ L                  |
| IgG (serum)                                                              | 625 mg/dL                                                 | 528-2190 mg/dL                     |
| IgM (serum)                                                              | 86 mg/dL                                                  | 48-226 mg/dL                       |
| IgA (serum)                                                              | 71 mg/dL                                                  | 41-297 mg/dL                       |
| IgE (serum)                                                              | 320 IU/mL                                                 | 0-56 IU/mL                         |
| Antibodies to tetanus                                                    | 4.41 IU/mL                                                | 0.1-13.1 IU/mL                     |
| Antibodies to diphtheria                                                 | 0.26 IU/mL                                                | >0.01 IU/mL                        |
| Antibodies to Haemophilus influenzae B                                   | <0.11 $\mu$ g/mL                                          | 0.05-7.00 $\mu$ g/mL               |
| Antibodies to Streptococcus pneumoniae antigens                          | To 5 of 12 antigens<br>>200 ng antibody nitrogen/mL serum | >200 ng antibody nitrogen/mL serum |
| Varicella Zoster IgG                                                     | 2.94                                                      | >1.09 ISR                          |
| Isohemagglutinins (ABO Group A)                                          |                                                           |                                    |
| Anti-B titer IgG                                                         | 32                                                        |                                    |
| Anti-B titer IgM                                                         | 32                                                        |                                    |

\*Studies were carried out while on prednisolone 1-2 mg/kg for several months. AM cortisol levels at the time of testing were undetectable.

VZV: Varicella Zoster virus; CNS: central nervous system; TCR: T cell receptor; WBC: white blood cells; PHA: phytohemagglutinin; ConA: Concanavalin A; PWM: pokeweed mitogen.
